# Supplementary material
Source: PubMed Central journal article supplement (PMC3307639)
Supplement: supp_M018846_jlr.M018846-1.pdf [file supp_M018846_jlr.M018846-1.pdf]

**Supplementary Tab. I:** Fat depot nomenclatures used in the present paper and nomenclatures used by other researchers.

No references are provided for widely used terms

**Nomenclature used in this paper**

***Other nomenclatures***

|          |                                     |                                                                                     |
|----------|-------------------------------------|-------------------------------------------------------------------------------------|
| <b>A</b> | <b>Anterior subcutaneous depot</b>  |                                                                                     |
| A-1      | deep cervical portion               | <i>Deep Cervical fat (STOREY CF. et al. Dis Chest 1953 Apr;23(4):257-82)</i>        |
| A-2      | superficial cervical portion        | <i>Cervical fat (Hardman MJ. et al. J Physiol. 1973 Nov;235(1):1-8)</i>             |
| A-3      | interscapular portion               | <i>Interscapular BAT (widely used)</i>                                              |
| A-4      | subscapular portion                 | <i>Scapular fat (Stern JS. et al. Am J Physiol. 1984 Nov;247(5 Pt 2):R918-26)</i>   |
| A-5      | axillo-thoracic portion             | <i>Axillary fat (Lehmann JR. et al. Am Fam Physician 1972 Nov;6(5):96-7)</i>        |
|          |                                     |                                                                                     |
| <b>B</b> | <b>Posterior subcutaneous depot</b> |                                                                                     |
| B-1      | inguinal-dorsolumbar portion        | <i>Inguinal fat (widely used)</i>                                                   |
| B-2      | gluteal portion                     | <i>Gluteal fat (Wolf GA. et al. Aesthetic Plast Surg. 2006 Jul-Aug;30(4):460-8)</i> |
|          |                                     |                                                                                     |
| <b>C</b> | <b>Mediastinal depot</b>            | <i>Mediastinal fat (Sharma AM. Hypertension 2004 Aug;44(2):117-8)</i>               |
|          |                                     |                                                                                     |
| <b>D</b> | <b>Mesenteric depot</b>             | <i>Mesenteric fat (widely used)</i>                                                 |
|          |                                     |                                                                                     |
| <b>E</b> | <b>Retroperitoneal depot</b>        | <i>Retroperitoneal fat (widely used)</i>                                            |
|          |                                     |                                                                                     |
| <b>F</b> | <b>Abdominopelvic depot</b>         |                                                                                     |
| F-1      | interrenal portion                  | <i>Perirenal fat (Asensi V. et al. Clin Infect Dis. 2004 Jul 15;39(2):240-7)</i>    |
| F-2      | periovarian portion                 | <i>Gonadal fat (widely used)</i>                                                    |
| F-3      | parametrial portion                 | <i>Parametrial fat (Young P. et al. FEBS Lett. 1984 Feb 13;167(1):10-4)</i>         |
| F-4      | perivesical portion                 | <i>Perivesical fat (Scosyrev E. et al. Urology 2010 Oct;76(4):908-13)</i>           |

**Supplementary Tab. II:** Composition of the different sub-depots forming the C57BL/6J mouse adipose organ. Number ( $\times 10^6$ ) and proportion of each adipocyte type. Significant differences between cell numbers found at different temperatures are marked by asterisks (\* $p < 0.05$ ; \*\*  $p < 0.01$ ).

|                               |              | No. unilocular adipocytes |           | No. UCP1-positive multilocular adipocytes |            | No. UCP1-negative multilocular adipocytes |        | Adipocytes Total No. |
|-------------------------------|--------------|---------------------------|-----------|-------------------------------------------|------------|-------------------------------------------|--------|----------------------|
| <b>Anterior subcutaneous</b>  |              |                           |           |                                           |            |                                           |        |                      |
| <b>deep cervical</b>          |              |                           |           |                                           |            |                                           |        |                      |
| 28°C                          | 3 ± 2        | (60%)                     | 1 ± 0.5   | (20%)                                     | 1 ± 0.7    | (20%)                                     | 5 ± 1  |                      |
| 6°C                           | 0.2 ± 0.1    | (4%)                      | 4 ± 3     | (77%)                                     | 0.9 ± 0.3  | (19%)                                     | 5 ± 3  |                      |
| <b>superficial cervical</b>   |              |                           |           |                                           |            |                                           |        |                      |
| 28°C                          | 11 ± 1       | (79%)                     | 2 ± 1     | (14%)                                     | 1 ± 0.7    | (7%)                                      | 14 ± 1 |                      |
| 6°C                           | 5 ± 1 *      | (38%)                     | 7 ± 2 *   | (54%)                                     | 1 ± 0.2    | (8%)                                      | 13 ± 1 |                      |
| <b>interscapular BAT</b>      |              |                           |           |                                           |            |                                           |        |                      |
| 28°C                          | 8 ± 2        | (53%)                     | 6 ± 2     | (40%)                                     | 0.9 ± 0.1  | (7%)                                      | 15 ± 2 |                      |
| 6°C                           | 6 ± 1        | (25%)                     | 17 ± 3 *  | (71%)                                     | 1 ± 0.1    | (4%)                                      | 24 ± 4 |                      |
| <b>subscapular</b>            |              |                           |           |                                           |            |                                           |        |                      |
| 28°C                          | 5 ± 2        | (50%)                     | 2 ± 1     | (20%)                                     | 3 ± 0.4    | (30%)                                     | 10 ± 2 |                      |
| 6°C                           | 0.2 ± 0.1 ** | (2%)                      | 12 ± 2 ** | (98%)                                     | 0          | (0%)                                      | 12 ± 2 |                      |
| <b>axillo-thoracic</b>        |              |                           |           |                                           |            |                                           |        |                      |
| 28°C                          | 29 ± 5       | (92%)                     | 0.5 ± 0.1 | (2%)                                      | 2 ± 0.4    | (6%)                                      | 32 ± 9 |                      |
| 6°C                           | 14 ± 3 *     | (47%)                     | 13 ± 4 *  | (43%)                                     | 3 ± 0.4    | (10%)                                     | 30 ± 5 |                      |
| <b>Posterior subcutaneous</b> |              |                           |           |                                           |            |                                           |        |                      |
| <b>inguinal-dorsolumbar</b>   |              |                           |           |                                           |            |                                           |        |                      |
| 28°C                          | 10 ± 1       | (95%)                     | 0         | (0%)                                      | 0.5 ± 0.06 | (5%)                                      | 11 ± 1 |                      |
| 6°C                           | 12 ± 2       | (82%)                     | 0.6 ± 0.1 | (4%)                                      | 2 ± 0.4 *  | (14%)                                     | 15 ± 3 |                      |

|                        |                    |          |        |                |       |            |       |          |
|------------------------|--------------------|----------|--------|----------------|-------|------------|-------|----------|
|                        | <b>gluteal</b>     |          |        |                |       |            |       |          |
|                        | 28°C               | 4 ± 0.4  | (100%) | 0              | (0%)  | 0          | (0%)  | 4 ± 0.4  |
|                        | 6°C                | 4 ± 0.4  | (100%) | 0              | (0%)  | 0          | (0%)  | 4 ± 1    |
| <b>Mediastinal</b>     |                    |          |        |                |       |            |       |          |
|                        | 28°C               | 6 ± 3    | (38%)  | 8 ± 3          | (61%) | 0.2 ± 0.08 | (2%)  | 13 ± 3   |
|                        | 6°C                | 1 ± 0.3  | (9%)   | 7 ± 1          | (64%) | 3 ± 0.1    | (27%) | 11 ± 1   |
| <b>Mesenteric</b>      |                    |          |        |                |       |            |       |          |
|                        | 28°C               | 12 ± 0.6 | (92%)  | 0              | (0%)  | 0.7 ± 0.4  | (8%)  | 13 ± 0.3 |
|                        | 6°C                | 10 ± 1   | (91%)  | 0.003 ± 0.002  | (0%)  | 1 ± 0.3    | (9%)  | 11 ± 1   |
| <b>Retroperitoneal</b> |                    |          |        |                |       |            |       |          |
|                        | 28°C               | 2 ± 1    | (100%) | 0              | (0%)  | 0          | (0%)  | 2 ± 1    |
|                        | 6°C                | 2 ± 0.2  | (83%)  | 0.001 ± 0.0002 | (0%)  | 0.4 ± 0.1  | (17%) | 2 ± 0.4  |
| <b>Abdominopelvic</b>  |                    |          |        |                |       |            |       |          |
|                        | <b>interrenal</b>  |          |        |                |       |            |       |          |
|                        | 28°C               | 4 ± 1    | (73%)  | 0.5 ± 0.2      | (9%)  | 1 ± 0.04   | (18%) | 6 ± 1    |
|                        | 6°C                | 3 ± 1    | (43%)  | 3 ± 0.3**      | (43%) | 1 ± 0.1    | (14%) | 7 ± 1    |
|                        | <b>periovarian</b> |          |        |                |       |            |       |          |
|                        | 28°C               | 3 ± 0.2  | (75%)  | 0              | (0%)  | 1 ± 0.1    | (25%) | 4 ± 0.2  |
|                        | 6°C                | 2 ± 0.2  | (40%)  | 0              | (0%)  | 3 ± 0.2    | (60%) | 5 ± 0.4  |
|                        | <b>parametrial</b> |          |        |                |       |            |       |          |
|                        | 28°C               | 11 ± 2   | (83%)  | 0.2 ± 0.1      | (2%)  | 2 ± 0.2    | (15%) | 13 ± 2   |
|                        | 6°C                | 5 ± 2 *  | (38%)  | 4 ± 1*         | (31%) | 4 ± 0.2*   | (31%) | 13 ± 1   |
|                        | <b>perivesical</b> |          |        |                |       |            |       |          |
|                        | 28°C               | 9 ± 1    | (95%)  | 0              | (0%)  | 0.5 ± 0.1  | (5%)  | 10 ± 1   |
|                        | 6°C                | 5 ± 2*   | (60%)  | 0.3 ± 0.1      | (4%)  | 3 ± 1*     | (36%) | 8 ± 1    |
