# Supplementary material
Source: PubMed Central journal article supplement (PMC3307639)
Supplement: supp_M018846_jlr.M018846-2.pdf [file supp_M018846_jlr.M018846-2.pdf]

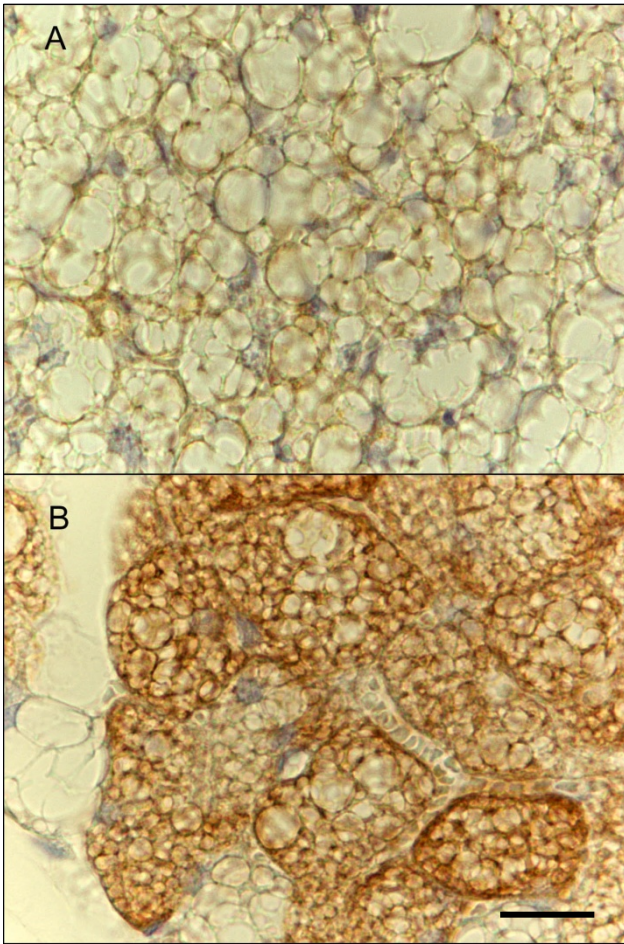

**Supplementary Figure 1.** UCP1 immunoreactivity (brown) of positive multilocular adipocytes in the interscapular portion (interscapular BAT) of the anterior subcutaneous depot of C57BL/6J mice maintained at 28°C (A) or 6°C (B) for 10 days. Scale bar for both: 12  $\mu$ m.

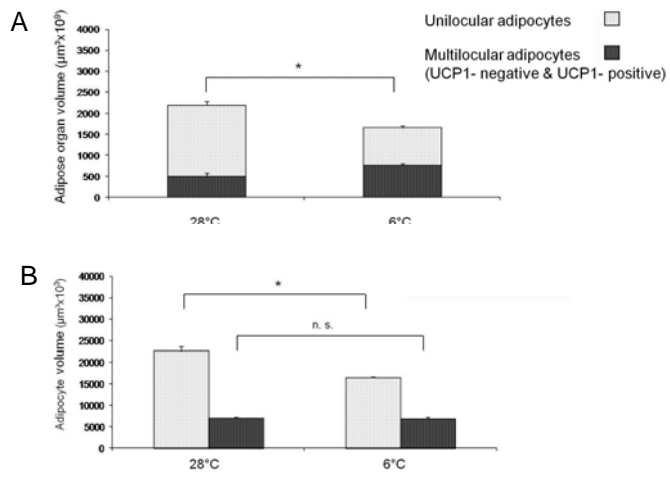

**Supplementary Figure 2.** The volume reduction of the C57BL/6J adipose organ (A) corresponds to the white adipocyte volume reduction after cold acclimation (B). Values are mean  $\pm$  SEM. \* $p < 0.05$ .
